# Supplementary material
Source: publisher figshare collection journal article supplement (https://frontiersin.figshare.com/ndownloader/files/25765607)
Supplement: Supplementary file 1 [file 25765607]

## Appendix 2: Correlation coefficients for environmental variables included in species distribution models for the Plains and Ozarks Ecoregions of Missouri (See Appendix 1 for variable codes):

### Plains Ecoregion

|       | EDU   | AES   | SO    | DS    | RG    | SG    | GEO   | URB_L | AG_L  | GRS_L | FOR_L | WET_L | AG_U  | GRS_U | FOR_U | WET_U | SPR_L | SPR_U | DAM_L | DAM_U | HI_L  | HI_U  | RS_L  | RS_U  | HTI_L | HTI_U | LRI   |       |
|-------|-------|-------|-------|-------|-------|-------|-------|-------|-------|-------|-------|-------|-------|-------|-------|-------|-------|-------|-------|-------|-------|-------|-------|-------|-------|-------|-------|-------|
| EDU   |       | -0.22 | 0.02  | -0.05 | -0.03 | -0.04 | -0.14 | 0.03  | -0.02 | -0.10 | 0.12  | -0.01 | 0.28  | -0.36 | 0.04  | 0.05  | 0.12  | 0.15  | -0.05 | 0.15  | -0.07 | -0.18 | 0.00  | -0.07 | 0.10  | 0.07  | 0.09  |       |
| AES   | -0.22 |       | -0.02 | 0.02  | 0.16  | 0.18  | 0.10  | -0.06 | -0.18 | 0.07  | 0.16  | -0.03 | -0.13 | 0.05  | 0.19  | -0.12 | 0.00  | -0.01 | -0.06 | -0.18 | 0.00  | -0.25 | -0.03 | -0.05 | -0.02 | 0.03  | 0.16  |       |
| SO    | 0.02  | -0.02 |       | 0.62  | -0.44 | -0.62 | -0.05 | 0.02  | 0.14  | -0.24 | 0.05  | 0.24  | -0.06 | 0.03  | 0.07  | 0.20  | -0.01 | 0.19  | -0.06 | -0.07 | -0.12 | -0.17 | 0.11  | -0.06 | 0.11  | 0.28  | -0.14 |       |
| DS    | -0.05 | 0.02  | 0.62  |       | -0.30 | -0.44 | -0.01 | 0.01  | 0.07  | -0.19 | 0.09  | 0.21  | -0.09 | 0.05  | 0.08  | 0.18  | -0.07 | 0.12  | -0.07 | -0.12 | -0.08 | -0.20 | 0.06  | -0.11 | 0.11  | 0.18  | -0.14 |       |
| RG    | -0.03 | 0.16  | -0.44 | -0.30 |       | 0.68  | 0.08  | 0.00  | -0.19 | 0.14  | 0.10  | -0.10 | 0.02  | -0.10 | 0.11  | -0.11 | -0.01 | -0.08 | 0.07  | 0.06  | 0.23  | 0.13  | 0.00  | 0.16  | -0.07 | -0.05 | 0.25  |       |
| SG    | -0.04 | 0.18  | -0.62 | -0.44 | 0.68  |       | 0.02  | 0.00  | -0.24 | 0.20  | 0.10  | -0.13 | -0.01 | -0.09 | 0.17  | -0.19 | 0.04  | -0.10 | 0.07  | 0.10  | 0.08  | 0.10  | -0.06 | 0.19  | -0.11 | -0.14 | 0.27  |       |
| GEO   | -0.14 | 0.10  | -0.05 | -0.01 | 0.08  | 0.02  |       | 0.00  | -0.13 | 0.08  | 0.07  | -0.05 | -0.19 | 0.14  | 0.14  | -0.01 | -0.03 | -0.03 | -0.03 | -0.02 | 0.03  | 0.00  | -0.02 | -0.01 | -0.01 | 0.00  | 0.10  |       |
| URB_L | 0.03  | -0.06 | 0.02  | 0.01  | 0.00  | 0.00  | 0.00  |       | 0.00  | -0.11 | -0.07 | 0.00  | -0.02 | -0.08 | -0.11 | 0.15  | -0.04 | -0.02 | 0.04  | 0.11  | 0.13  | 0.00  | -0.01 | -0.01 | 0.36  | 0.33  | 0.27  | -0.08 |
| AG_L  | -0.02 | -0.18 | 0.14  | 0.07  | -0.19 | -0.24 | -0.13 | -0.11 |       | -0.61 | -0.56 | -0.03 | 0.50  | -0.40 | -0.31 | 0.12  | -0.01 | 0.05  | -0.09 | -0.05 | -0.03 | 0.06  | 0.04  | 0.00  | 0.16  | 0.04  | -0.46 |       |
| GRS_L | -0.10 | 0.07  | -0.24 | -0.19 | 0.14  | 0.20  | 0.08  | -0.07 | -0.61 |       | -0.30 | -0.17 | -0.34 | 0.44  | -0.05 | -0.15 | -0.02 | -0.03 | 0.04  | 0.05  | 0.13  | 0.12  | -0.04 | 0.00  | 0.13  | -0.08 | -0.19 |       |
| FOR_L | 0.12  | 0.16  | 0.05  | 0.09  | 0.10  | 0.10  | 0.07  | 0.00  | -0.56 | -0.30 |       | 0.12  | -0.24 | 0.04  | 0.40  | -0.02 | 0.05  | -0.04 | 0.04  | -0.02 | -0.09 | -0.19 | 0.00  | -0.08 | -0.40 | -0.03 | 0.78  |       |
| WET_L | -0.01 | -0.03 | 0.24  | 0.21  | -0.10 | -0.13 | -0.05 | -0.02 | -0.03 | -0.17 | 0.12  |       | -0.05 | 0.05  | 0.02  | 0.35  | -0.02 | -0.02 | 0.00  | -0.03 | -0.03 | -0.08 | 0.00  | -0.07 | -0.08 | 0.06  | 0.13  |       |
| AG_U  | 0.28  | -0.13 | -0.06 | -0.09 | 0.02  | -0.01 | -0.19 | -0.08 | 0.50  | -0.34 | -0.24 | -0.05 |       | -0.84 | -0.56 | 0.11  | 0.03  | 0.07  | -0.06 | -0.07 | -0.01 | 0.01  | 0.07  | 0.03  | 0.05  | 0.10  | -0.19 |       |
| GRS_U | -0.36 | 0.05  | 0.03  | 0.05  | -0.10 | -0.09 | 0.14  | -0.11 | -0.40 | 0.44  | 0.04  | 0.05  | -0.84 |       | 0.05  | -0.10 | -0.08 | -0.12 | 0.04  | -0.03 | 0.05  | 0.12  | -0.05 | -0.10 | -0.10 | -0.15 | 0.02  |       |
| FOR_U | 0.04  | 0.19  | 0.07  | 0.08  | 0.11  | 0.17  | 0.14  | 0.15  | -0.31 | -0.05 | 0.40  | 0.02  | -0.56 | 0.05  |       | -0.06 | 0.08  | 0.06  | 0.04  | 0.17  | -0.06 | -0.21 | -0.05 | -0.03 | 0.01  | -0.06 | 0.34  |       |
| WET_U | 0.05  | -0.12 | 0.20  | 0.18  | -0.11 | -0.19 | -0.01 | -0.04 | 0.12  | -0.15 | -0.02 | 0.35  | 0.11  | -0.10 | -0.06 |       | -0.02 | -0.04 | -0.06 | -0.02 | 0.03  | -0.06 | 0.13  | -0.06 | -0.08 | 0.08  | 0.00  |       |
| SPR_L | 0.12  | 0.00  | -0.01 | -0.07 | -0.01 | 0.04  | -0.03 | -0.02 | -0.01 | -0.02 | 0.05  | -0.02 | 0.03  | -0.08 | 0.08  | -0.02 |       | 0.04  | -0.02 | 0.03  | 0.00  | -0.04 | -0.02 | -0.02 | 0.01  | 0.00  | 0.06  |       |
| SPR_U | 0.15  | -0.01 | 0.19  | 0.12  | -0.08 | -0.10 | -0.03 | 0.04  | 0.05  | -0.03 | -0.04 | -0.02 | 0.07  | -0.12 | 0.06  | -0.04 | 0.04  |       | -0.02 | 0.01  | -0.03 | -0.09 | 0.01  | 0.01  | 0.12  | 0.01  | -0.06 |       |
| DAM_L | -0.05 | -0.06 | -0.06 | -0.07 | 0.07  | 0.07  | -0.03 | 0.11  | -0.09 | 0.04  | 0.04  | 0.00  | -0.06 | 0.04  | -0.04 | -0.06 | -0.02 | -0.02 |       | 0.31  | 0.08  | 0.08  | -0.01 | 0.15  | 0.17  | 0.12  | 0.01  |       |
| DAM_U | 0.15  | -0.18 | -0.07 | -0.12 | 0.06  | 0.10  | -0.02 | 0.13  | -0.05 | 0.05  | -0.02 | -0.03 | -0.07 | -0.03 | 0.17  | -0.02 | 0.03  | 0.01  | 0.31  |       | 0.17  | 0.29  | -0.02 | 0.21  | 0.24  | 0.33  | -0.01 |       |
| HI_L  | -0.07 | 0.00  | -0.12 | -0.08 | 0.23  | 0.08  | 0.03  | 0.00  | -0.03 | 0.13  | -0.09 | -0.03 | -0.01 | 0.05  | -0.06 | 0.03  | 0.00  | -0.03 | 0.08  | 0.17  |       | 0.20  | -0.04 | 0.04  | 0.08  | -0.01 | 0.03  |       |
| HI_U  | -0.18 | -0.25 | -0.17 | -0.20 | 0.13  | 0.10  | 0.00  | -0.01 | 0.06  | 0.12  | -0.19 | -0.08 | 0.01  | 0.12  | -0.21 | -0.06 | -0.04 | -0.09 | 0.08  | 0.29  | 0.20  |       | 0.03  | 0.35  | 0.07  | 0.24  | -0.10 |       |
| RS_L  | 0.00  | -0.03 | 0.11  | 0.06  | 0.00  | -0.06 | -0.02 | -0.01 | 0.04  | -0.04 | 0.00  | 0.00  | 0.07  | -0.05 | -0.05 | 0.13  | -0.02 | 0.01  | -0.01 | -0.02 | -0.04 | 0.03  |       | 0.04  | 0.04  | 0.10  | 0.17  |       |
| RS_U  | -0.07 | -0.05 | -0.06 | -0.11 | 0.16  | 0.19  | -0.01 | 0.36  | 0.00  | 0.00  | -0.08 | -0.07 | 0.03  | -0.10 | -0.03 | -0.06 | -0.02 | 0.01  | 0.15  | 0.21  | 0.04  | 0.35  | 0.04  |       | 0.28  | 0.52  | -0.12 |       |
| HTI_L | 0.10  | -0.02 | 0.11  | 0.11  | -0.07 | -0.11 | -0.01 | 0.33  | 0.16  | 0.13  | -0.40 | -0.08 | 0.05  | -0.10 | 0.01  | -0.08 | 0.01  | 0.12  | 0.17  | 0.24  | 0.08  | 0.07  | 0.04  | 0.28  |       | 0.36  | -0.50 |       |
| HTI_U | 0.07  | 0.03  | 0.28  | 0.18  | -0.05 | -0.14 | 0.00  | 0.27  | 0.04  | -0.08 | -0.03 | 0.06  | 0.10  | -0.15 | -0.06 | 0.08  | 0.00  | 0.01  | 0.12  | 0.33  | -0.01 | 0.24  | 0.10  | 0.52  | 0.36  |       | -0.13 |       |
| LRI   | 0.09  | 0.16  | -0.14 | -0.14 | 0.25  | 0.27  | 0.10  | -0.08 | -0.46 | -0.19 | 0.78  | 0.13  | -0.19 | 0.02  | 0.34  | 0.00  | 0.06  | -0.06 | 0.01  | -0.01 | 0.03  | -0.10 | 0.17  | -0.12 | -0.50 | -0.13 |       |       |

### Ozarks Ecoregion

|       | EDU   | AES   | SO    | DS    | RG    | SG    | GEO   | URB_L | AG_L  | GRS_L | FOR_L | WET_L | AG_U  | GRS_U | FOR_U | WET_U | SPR_L | SPR_U | DAM_L | DAM_U | HI_L  | HI_U  | RS_L  | RS_U  | HTI_L | HTI_U | LRI   |
|-------|-------|-------|-------|-------|-------|-------|-------|-------|-------|-------|-------|-------|-------|-------|-------|-------|-------|-------|-------|-------|-------|-------|-------|-------|-------|-------|-------|
| EDU   |       | 0.17  | -0.10 | -0.07 | 0.04  | 0.04  | -0.01 | -0.01 | 0.08  | 0.10  | -0.14 | 0.05  | 0.11  | 0.04  | -0.09 | 0.08  | -0.08 | 0.11  | 0.00  | 0.04  | -0.06 | -0.07 | 0.05  | -0.09 | 0.08  | -0.01 | -0.05 |
| AES   | 0.17  |       | 0.06  | 0.10  | 0.06  | 0.12  | 0.08  | -0.08 | -0.31 | -0.03 | 0.20  | -0.05 | -0.53 | -0.14 | 0.36  | -0.22 | -0.01 | 0.22  | -0.03 | -0.01 | -0.12 | -0.20 | 0.05  | 0.02  | 0.00  | -0.11 | 0.17  |
| SO    | -0.10 | 0.06  |       | 0.60  | -0.43 | -0.63 | 0.03  | -0.11 | 0.02  | 0.04  | -0.02 | 0.03  | -0.09 | 0.09  | -0.03 | -0.09 | 0.04  | 0.48  | -0.07 | -0.18 | -0.07 | 0.04  | 0.02  | -0.04 | 0.17  | 0.20  | -0.21 |
| DS    | -0.07 | 0.10  | 0.60  |       | -0.35 | -0.48 | -0.01 | -0.04 | 0.07  | -0.05 | 0.02  | 0.06  | -0.09 | -0.01 | 0.06  | -0.06 | -0.02 | 0.39  | -0.06 | -0.12 | -0.14 | -0.04 | -0.01 | 0.00  | 0.15  | 0.16  | -0.17 |
| RG    | 0.04  | 0.06  | -0.43 | -0.35 |       | 0.66  | 0.01  | -0.01 | -0.16 | -0.13 | 0.21  | -0.04 | -0.11 | -0.20 | 0.23  | -0.05 | 0.04  | -0.18 | 0.05  | 0.07  | -0.05 | -0.18 | 0.15  | -0.04 | -0.21 | -0.28 | 0.31  |
| SG    | 0.04  | 0.12  | -0.63 | -0.48 | 0.66  |       | -0.03 | 0.01  | -0.23 | -0.21 | 0.31  | -0.06 | -0.16 | -0.28 | 0.32  | -0.06 | 0.04  | -0.29 | 0.03  | 0.07  | -0.04 | -0.27 | 0.03  | -0.03 | -0.25 | -0.39 | 0.43  |
| GEO   | -0.01 | 0.08  | 0.03  | -0.01 | 0.01  | -0.03 |       | -0.01 | -0.10 | 0.07  | -0.02 | -0.02 | -0.10 | -0.02 | 0.07  | -0.06 | 0.03  | -0.01 | 0.04  | -0.02 | -0.05 | -0.02 | 0.08  | -0.04 | -0.06 | -0.09 | -0.01 |
| URB_L | -0.01 | -0.08 | -0.11 | -0.04 | -0.01 | 0.01  | -0.01 |       | -0.03 | -0.06 | -0.13 | -0.01 | 0.00  | -0.03 | -0.06 | 0.06  | 0.06  | -0.05 | 0.01  | 0.04  | 0.00  | -0.03 | 0.03  | 0.31  | 0.24  | 0.21  | -0.14 |
| AG_L  | 0.08  | -0.31 | 0.02  | 0.07  | -0.16 | -0.23 | -0.10 | -0.03 |       | -0.12 | -0.38 | 0.11  | 0.57  | -0.03 | -0.23 | 0.13  | -0.10 | -0.17 | 0.06  | 0.18  | -0.01 | 0.08  | 0.01  | -0.01 | 0.15  | 0.17  | -0.31 |
| GRS_L | 0.10  | -0.03 | 0.04  | -0.05 | -0.13 | -0.21 | 0.07  | -0.06 | -0.12 |       | -0.85 | -0.06 | -0.04 | 0.66  | -0.57 | -0.03 | -0.07 | 0.05  | -0.07 | -0.20 | 0.20  | 0.45  | 0.08  | 0.19  | 0.51  | 0.35  | -0.73 |
| FOR_L | -0.14 | 0.20  | -0.02 | 0.02  | 0.21  | 0.31  | -0.02 | -0.13 | -0.38 | -0.85 |       | 0.00  | -0.25 | -0.59 | 0.65  | -0.06 | 0.10  | 0.04  | 0.03  | 0.08  | -0.18 | -0.45 | -0.08 | -0.23 | -0.60 | -0.46 | 0.85  |
| WET_L | 0.05  | -0.05 | 0.03  | 0.06  | -0.04 | -0.06 | -0.02 | -0.01 | 0.11  | -0.06 | 0.00  |       | 0.00  | 0.01  | -0.01 | 0.02  | 0.04  | -0.02 | -0.01 | -0.03 | 0.00  | 0.00  | -0.02 | -0.02 | 0.01  | 0.00  | -0.01 |
| AG_U  | 0.11  | -0.53 | -0.09 | -0.09 | -0.11 | -0.16 | -0.10 | 0.00  | 0.57  | -0.04 | -0.25 | 0.00  |       | 0.00  | -0.44 | 0.46  | -0.07 | -0.23 | 0.11  | 0.17  | 0.08  | 0.07  | -0.05 | -0.02 | 0.01  | 0.16  | -0.19 |
| GRS_U | 0.04  | -0.14 | 0.09  | -0.01 | -0.20 | -0.28 | -0.02 | -0.03 | -0.03 | 0.66  | -0.59 | 0.01  | 0.00  |       | -0.89 | -0.05 | -0.03 | 0.06  | -0.07 | -0.28 | 0.24  | 0.68  | -0.06 | 0.32  | 0.47  | 0.57  | -0.59 |
| FOR_U | -0.09 | 0.36  | -0.03 | 0.06  | 0.23  | 0.32  | 0.07  | -0.06 | -0.23 | -0.57 | 0.65  | -0.01 | -0.44 | -0.89 |       | -0.16 | 0.04  | 0.05  | 0.01  | 0.17  | -0.26 | -0.64 | 0.07  | -0.32 | -0.44 | -0.61 | 0.62  |
| WET_U | 0.08  | -0.22 | -0.09 | -0.06 | -0.05 | -0.06 | -0.06 | 0.06  | 0.13  | -0.03 | -0.06 | 0.02  | 0.46  | -0.05 | -0.16 |       | -0.04 | -0.09 | 0.02  | 0.22  | 0.07  | 0.02  | -0.03 | -0.01 | 0.00  | 0.10  | -0.03 |
| SPR_L | -0.08 | -0.01 | 0.04  | -0.02 | 0.04  | 0.04  | 0.03  | 0.06  | -0.10 | -0.07 | 0.10  | 0.04  | -0.07 | -0.03 | 0.04  | -0.04 |       | 0.06  | -0.01 | -0.04 | -0.01 | -0.07 | -0.04 | 0.00  | -0.02 | -0.05 | 0.09  |
| SPR_U | 0.11  | 0.22  | 0.48  | 0.39  | -0.18 | -0.29 | -0.01 | -0.05 | -0.17 | 0.05  | 0.04  | -0.02 | -0.23 | 0.06  | 0.05  | -0.09 | 0.06  |       | -0.05 | -0.16 | -0.05 | -0.04 | -0.01 | 0.01  | 0.15  | 0.10  | -0.07 |
| DAM_L | 0.00  | -0.03 | -0.07 | -0.06 | 0.05  | 0.03  | 0.04  | 0.01  | 0.06  | -0.07 | 0.03  | -0.01 | 0.11  | -0.07 | 0.01  | 0.02  | -0.01 | -0.05 |       | 0.17  | 0.17  | 0.03  | -0.02 | 0.00  | 0.08  | 0.06  | 0.04  |
| DAM_U | 0.04  | -0.01 | -0.18 | -0.12 | 0.07  | 0.07  | -0.02 | 0.04  | 0.18  | -0.20 | 0.08  | -0.03 | 0.17  | -0.28 | 0.17  | 0.22  | -0.04 | -0.16 | 0.17  |       | 0.01  | 0.12  | 0.00  | 0.01  | -0.05 | 0.12  | 0.13  |
| HI_L  | -0.06 | -0.12 | -0.07 | -0.14 | -0.05 | -0.04 | -0.05 | 0.00  | -0.01 | 0.20  | -0.18 | 0.00  | 0.08  | 0.24  | -0.26 | 0.07  | -0.01 | -0.05 | 0.17  | 0.01  |       | 0.28  | -0.09 | 0.17  | 0.30  | 0.21  | -0.15 |
| HI_U  | -0.07 | -0.20 | 0.04  | -0.04 | -0.18 | -0.27 | -0.02 | -0.03 | 0.08  | 0.45  | -0.45 | 0.00  | 0.07  | 0.68  | -0.64 | 0.02  | -0.07 | -0.04 | 0.03  | 0.12  | 0.28  |       | -0.05 | 0.30  | 0.36  | 0.55  | -0.45 |
| RS_L  | 0.05  | 0.05  | 0.02  | -0.01 | 0.15  | 0.03  | 0.08  | 0.03  | 0.01  | 0.08  | -0.08 | -0.02 | -0.05 | -0.06 | 0.07  | -0.03 | -0.04 | -0.01 | -0.02 | 0.00  | -0.09 | -0.05 |       | -0.03 | 0.08  | -0.08 | 0.04  |
| RS_U  | -0.09 | 0.02  | -0.04 | 0.00  | -0.04 | -0.03 | -0.04 | 0.31  | -0.01 | 0.19  | -0.23 | -0.02 | -0.02 | 0.32  | -0.32 | -0.01 | 0.00  | 0.01  | 0.00  | 0.01  | 0.17  | 0.30  | -0.03 |       | 0.33  | 0.61  | -0.22 |
| HTI_L | 0.08  | 0.00  | 0.17  | 0.15  | -0.21 | -0.25 | -0.06 | 0.24  | 0.15  | 0.51  | -0.60 | 0.01  | 0.01  | 0.47  | -0.44 | 0.00  | -0.02 | 0.15  | 0.08  | -0.05 | 0.30  | 0.36  | 0.08  | 0.33  |       | 0.54  | -0.63 |
| HTI_U | -0.01 | -0.11 | 0.20  | 0.16  | -0.28 | -0.39 | -0.09 | 0.21  | 0.17  | 0.35  | -0.46 | 0.00  | 0.16  | 0.57  | -0.61 | 0.10  | -0.05 | 0.10  | 0.06  | 0.12  | 0.21  | 0.55  | -0.08 | 0.61  | 0.54  |       | -0.50 |
| LRI   | -0.05 | 0.17  | -0.21 | -0.17 | 0.31  | 0.43  | -0.01 | -0.14 | -0.31 | -0.73 | 0.85  | -0.01 | -0.19 | -0.59 | 0.62  | -0.03 | 0.09  | -0.07 | 0.04  | 0.13  | -0.15 | 0.45  | 0.04  | -0.22 | -0.63 | -0.50 |       |
